# Supplementary material for: Detection of single nucleotide polymorphism by measuring extension kinetics with T7 exonuclease mediated isothermal amplification
Source: Royal Society of Chemistry journal article supplement (doi:10.1039/c7an00875a), 2017-10-17
Supplement: c7an00875a1.pdf [file c7an00875a1.pdf]

**Electronic Supplementary Material (ESI) for Analyst**  
**This journal is © The Royal Society of Chemistry 2017**

Supplementary Information

**Kinetics-based Detection of SNP for EGFR Mutation by Extension  
Reactions and T7 Exonuclease Mediated Isothermal Amplification**

*Miao Cui,<sup>a</sup> Xianjin Xiao,<sup>b</sup> Meiping Zhao,<sup>c</sup> and Bo Zheng<sup>\*ad</sup>*

## Reagents

The PCR kit was purchased from Zoman Biotech Co. (Beijing, China). The forward, reverse primers and the probe were synthesized in Sangon Co., China. The Exonuclease I and Cac8I restriction endonuclease were supplied by New England Biolabs (USA). The Klenow Fragment (exo-) was purchased from Enzymatics (USA) and the T7 Gene 6 Exonuclease was purchased from Affymetrix (USA).

## Low abundance detection of EGFR mutation with PCR amplicons

In a 200  $\mu\text{L}$  PCR tube, 40  $\mu\text{L}$  ddH<sub>2</sub>O, 5  $\mu\text{L}$  10 $\times$  Taq Buffer, 1  $\mu\text{L}$  dNTPs mixture (10 mM each), 1  $\mu\text{L}$  Taq DNA polymerase (2.5 U/  $\mu\text{L}$ ), 1  $\mu\text{L}$  forward primer (10  $\mu\text{M}$ ), 1  $\mu\text{L}$  reverse primer (10  $\mu\text{M}$ ) and 1  $\mu\text{L}$  mixed genome DNA template (26 ng/  $\mu\text{L}$ ) were added and mixed. The sequence of the forward primer was 5'-GCTCAGAGCCTGGCATGAA-3' and the sequence of the reverse primer was 5'-CATCCTCCCCTGCATGTGT-3'. The procedures for PCR amplification were: 95  $^{\circ}\text{C}$  15min, 35 cycles of 95  $^{\circ}\text{C}$  20s, 60  $^{\circ}\text{C}$  30s and 72  $^{\circ}\text{C}$  1min, followed by the further extension at 72  $^{\circ}\text{C}$  for 3min. After the amplification by PCR, we added 1.5  $\mu\text{L}$  Exonuclease I (30 U) and incubated at 37  $^{\circ}\text{C}$  for 30 min followed by inactivating at 85  $^{\circ}\text{C}$  for 20 min to remove the excess of the primers. Then we added 5.9  $\mu\text{L}$  10 $\times$  CutSmart Buffer and 1.5  $\mu\text{L}$  Cac8I (7.5 U) and incubated at 37  $^{\circ}\text{C}$  for 1 h, followed by inactivating at 70  $^{\circ}\text{C}$  for 20 min to cut the amplicons and leave the SNP site at the 3' terminus. Next we added 0.6  $\mu\text{L}$  forward primer (10  $\mu\text{M}$ ) and 3  $\mu\text{L}$  dNTPs (10 mM) to perform the one cycle asymmetric PCR and obtain the single stranded target with a SNP at its 3' terminus. We further added 1  $\mu\text{L}$  3285 mM NaCl, 1  $\mu\text{L}$  657 mM MgCl<sub>2</sub> and 1  $\mu\text{L}$  200  $\mu\text{M}$  probe to anneal to the target. We took 5  $\mu\text{L}$  from the mixture and added 0.5  $\mu\text{L}$  10 $\times$  Blue Buffer as well as 0.28  $\mu\text{L}$  Klenow Fragment (exo-) (14 U) and incubated at 37  $^{\circ}\text{C}$  for 15 min. After the incubation, we added 1.46  $\mu\text{L}$  T7 exonuclease (3.68 U/  $\mu\text{L}$  T7 exonuclease and 4.63 $\times$  T7 Gene 6 Exonuclease Buffer) to the mixture and detected the change of fluorescence intensity at 25  $^{\circ}\text{C}$ .

## Principles for calculating the reaction rate

The T7 exonuclease assisted signal amplification was a linear amplification process, i.e.,

$$\text{reaction rate} = \frac{d[\text{Product}]}{dt} = \frac{d(n \times \text{Signal})}{dt} = n \times \frac{d(\text{Signal})}{dt} \quad (n \text{ is a constant}) \quad [1]$$

From equation [1], the reaction rate was proportional to the first derivative of the reaction curve. We first calculated and found out the maximum first derivative from the burst phase of the curve. Then we fit the data points to a linear model with the  $k$  value around the maximum first derivative value. The  $k$  value from the linear model was denoted as the reaction rate. We then utilized the  $k$  value to differentiate the matching target and the target with SNP.

**Table S1.** DNA sequences used in the experiment. The SNP was in red color and underlined.

| Name                                                                                          | Sequence(5' → 3')                                |
|-----------------------------------------------------------------------------------------------|--------------------------------------------------|
| <b>Probe sequences for Klenow fragment (exo-) extension</b>                                   |                                                  |
| P-FAM                                                                                         | (FAM)TGCGCGTTATACCGCAGTCCGG<br>AGTGGCTAACG       |
| P-BHQ-1                                                                                       | CGGTATAACGCGCA(BHQ1)                             |
| <b>Target sequences for Klenow fragment (exo-) extension</b>                                  |                                                  |
| C14-G                                                                                         | CGTTAGCCACTCCG                                   |
| C14-A-ter                                                                                     | CGTTAGCCACTCC <u>A</u>                           |
| C14-C-ter                                                                                     | CGTTAGCCACTCC <u>C</u>                           |
| C14-T-ter                                                                                     | CGTTAGCCACTCC <u>T</u>                           |
| C14-A-sec                                                                                     | CGTTAGCCACTC <u>A</u> G                          |
| C14-G-sec                                                                                     | CGTTAGCCACTC <u>G</u> G                          |
| C14-T-sec                                                                                     | CGTTAGCCACTC <u>T</u> G                          |
| <b>Probe sequences for optimization of T7 exonuclease</b>                                     |                                                  |
| P-FAM-BHQ-1                                                                                   | (FAM)TT(BHQ1)CGCGTATTACCGCAG<br>TCCGGAGTGGCTAACG |
| <b>Target sequences for optimization of T7 exonuclease</b>                                    |                                                  |
| anti-probe                                                                                    | AAAACGTTAGCCACTCCGGACTGCG<br>GTAATACGCGAA        |
| <b>Probe sequences for Klenow fragment (exo-) with T7 exonuclease-assisted target cycling</b> |                                                  |
| P-FAM-BHQ-1                                                                                   | (FAM)TT(BHQ1)CGCGTATTACCGCAG                     |

### Target sequences for Klenow fragment (exo-) with T7 exonuclease-assisted target cycling

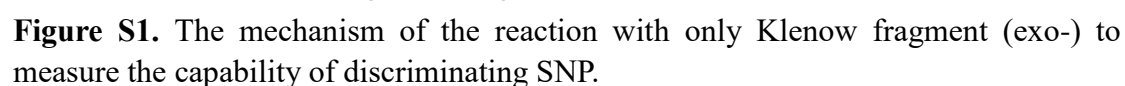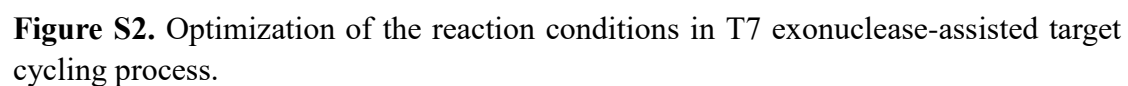

**Table S2.** Rate constants and discrimination factors of different types of single-base mismatching targets in the SNP detection with only Klenow fragment (exo-).

| Type of mismatching<br>base pair           |     | $k_{\text{obs}} \times 10^{-3} \text{ (s}^{-1}\text{)}$ | Discrimination Factor <sup>a</sup> |
|--------------------------------------------|-----|---------------------------------------------------------|------------------------------------|
| Mismatch at the<br>target terminus         | C:T | 11±2                                                    | 101                                |
|                                            | C:A | 7.3±0.5                                                 | 152                                |
|                                            | C:C | 1.5±0.2                                                 | 536                                |
| Mismatch next<br>to the target<br>terminus | G:T | 3.4±0.3                                                 | 326                                |
|                                            | G:A | 6.4±0.5                                                 | 173                                |
|                                            | G:G | 4±1                                                     | 278                                |

<sup>a</sup>  $k_{\text{obs, match}} = 1.11 \pm 0.09 \text{ s}^{-1}$ , Discrimination Factor =  $\frac{k_{\text{obs, match}}}{k_{\text{obs, mismatch}}}$
